# Supplementary material for: One-pot facile synthesis of reusable tremella-like M1@M2@M1(OH)2(M1= Co, Ni, M2= Pt/Pd, Pt, Pd and Au) three layers core–shell nanostructures as highly efficient catalysts
Source: Royal Society of Chemistry journal article supplement (doi:10.1039/c4nr01470g), 2014-06-18
Supplement: c4nr01470g1.pdf [file c4nr01470g1.pdf]

## Supporting Information

### One-pot facile synthesis of reusable tremella-like $M_1@M_2@M_1(OH)_2$ ( $M_1=Co, Ni, M_2=Pt/Pd, Pt, Pd$ and $Au$ ) three layers core-shell nanostructures as highly efficient catalysts

Yadong Liu, Zhen Fang, Long Kuai, and Baoyou Geng\*

Center for Nano Science and Technology, College of Chemistry and Materials Science, The Key Laboratory of Functional Molecular Solids, Ministry of Education, Anhui Laboratory of Molecular-Based Materials, Anhui Normal University, Wuhu, 241000, P. R. China.

Fax: (+) 86-553-3869303; E-mail: [bygeng@mail.ahnu.edu.cn](mailto:bygeng@mail.ahnu.edu.cn)

Figure S1

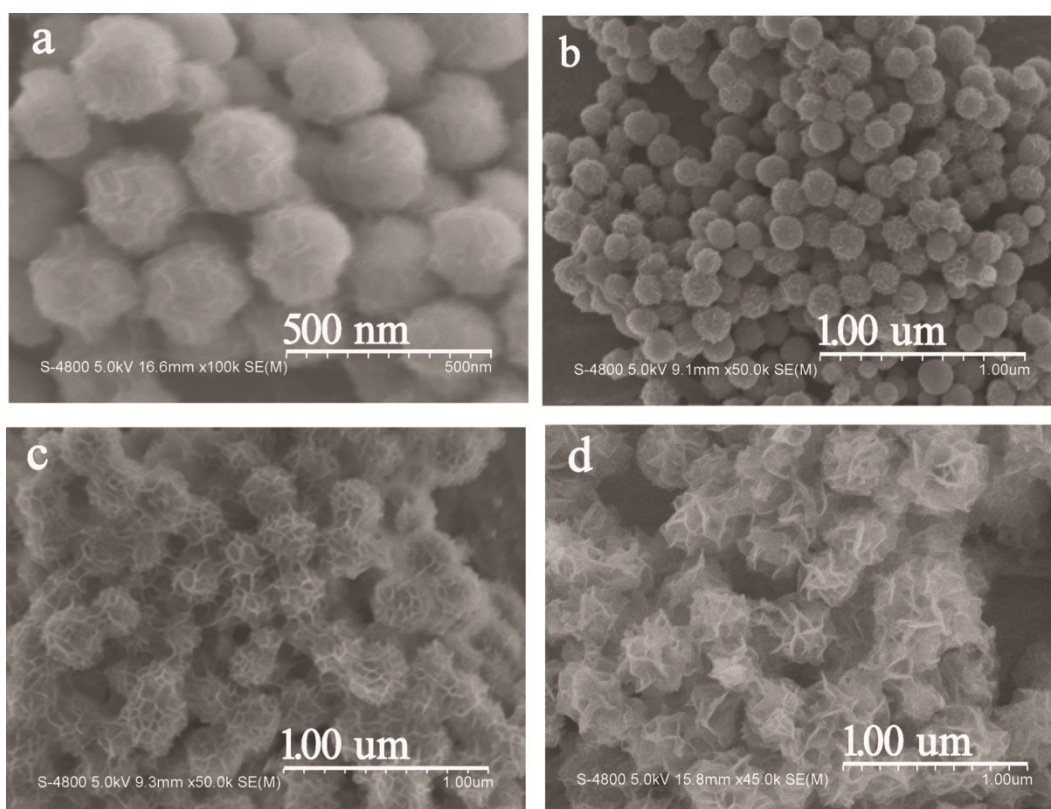

**Figure S1.** SEM images of  $Co@Pt@Co(OH)_2$  core-shell nanostructures: high (a) and low (b) magnification SEM images of composites with  $Co(OH)_2$  nanosheets less loaded when the reaction time of last step was short; (c) and (d) low-magnification SEM images of composites with  $Co(OH)_2$  nanosheets thicker loaded when the reaction temperature raised to 30 °C and 40 °C respectively.

**Figure S2**

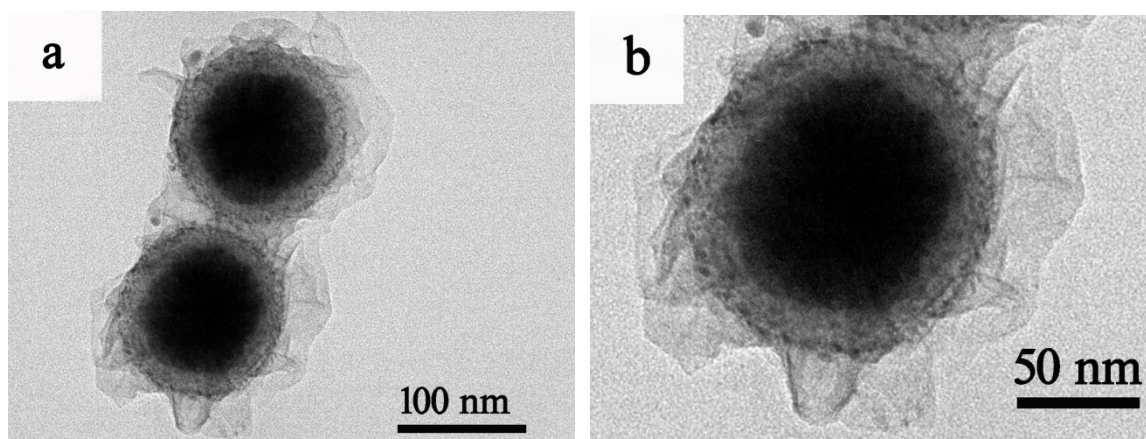

**Figure S2.** TEM images of Co@Pt/Pd@Co(OH)<sub>2</sub> core-shell nanostructures.

**Figure S3**

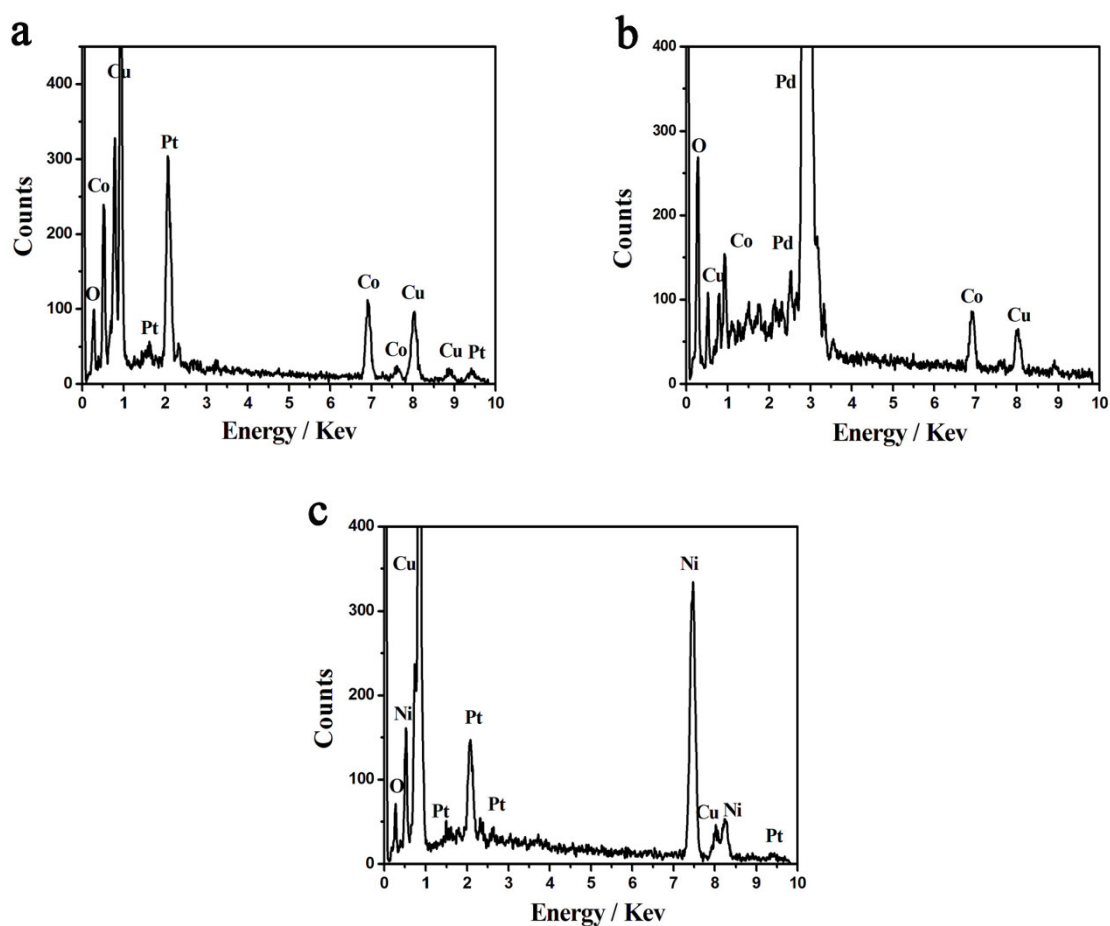

**Figure S3.** EDS analysis of as- prepared core-shell nanostructures: (a) Co@Pt@Co(OH)<sub>2</sub> composites; (b) Co@Pd@Co(OH)<sub>2</sub> composites; (c) Ni@Pt@Ni(OH)<sub>2</sub> composites.

Figure S4

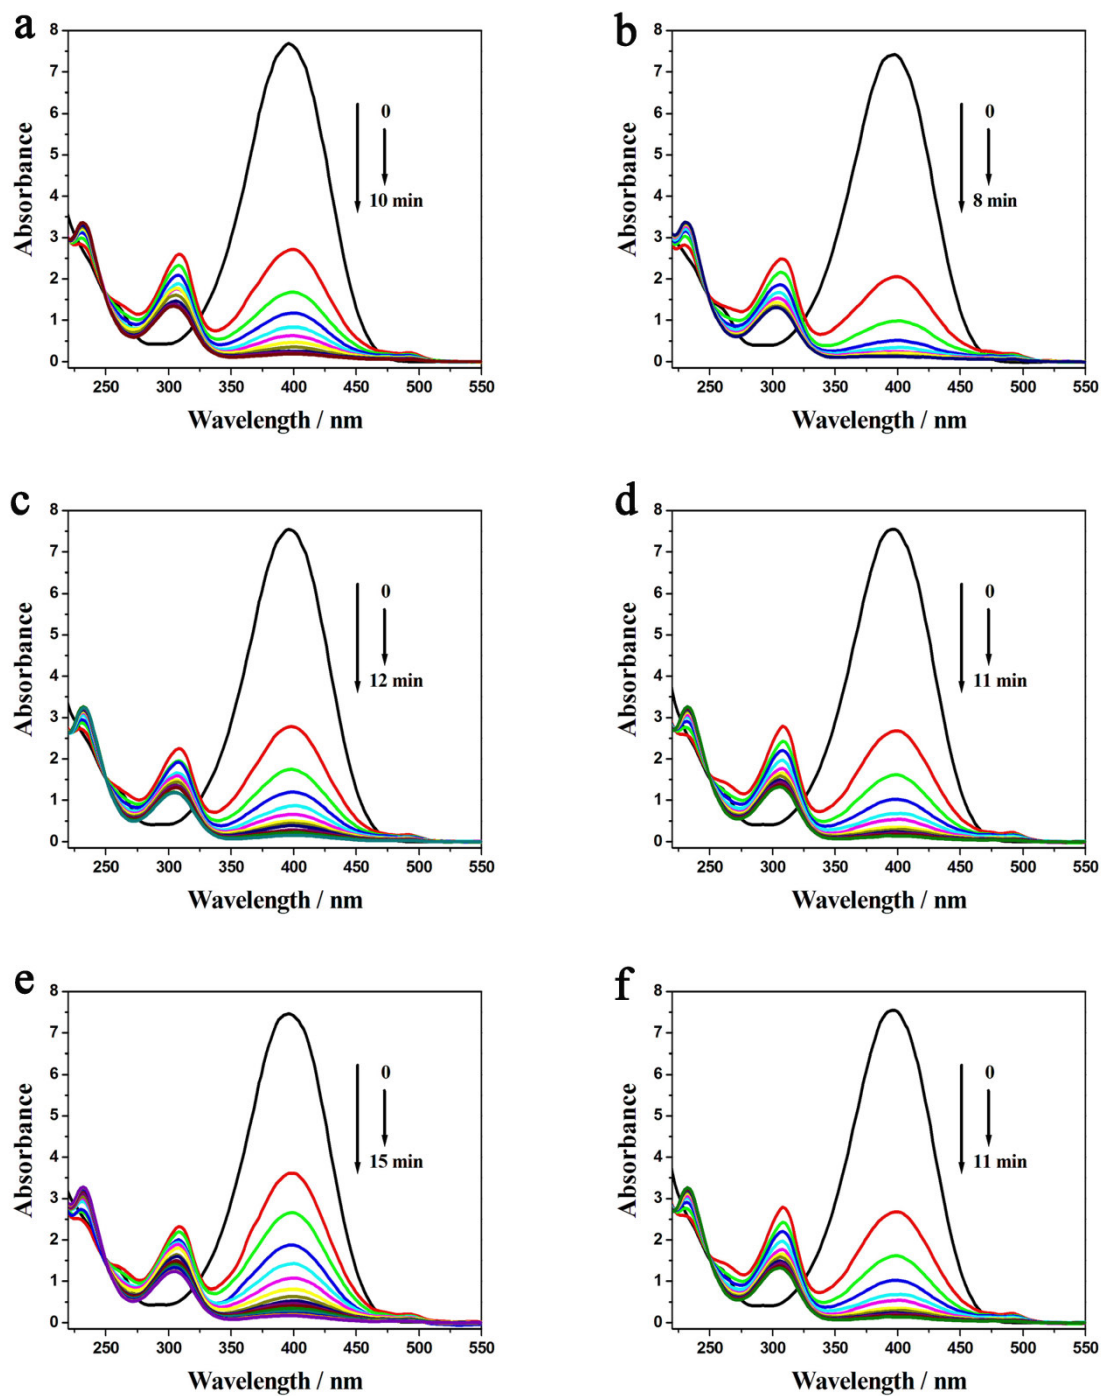

**Figure S4.** Time-dependent UV-vis spectral changes in 4-nitrophenol (4-NP) catalyzed by (a) 0.035 mg and (b) 0.05mg  $\text{Co@Pd@Co(OH)}_2$  catalysts, (c) 0.035 mg and (d) 0.05mg  $\text{Co@Pt@Co(OH)}_2$  catalysts, (e) 0.035 mg and (f) 0.05mg  $\text{Co@Au@Co(OH)}_2$  catalysts.

Figure S5

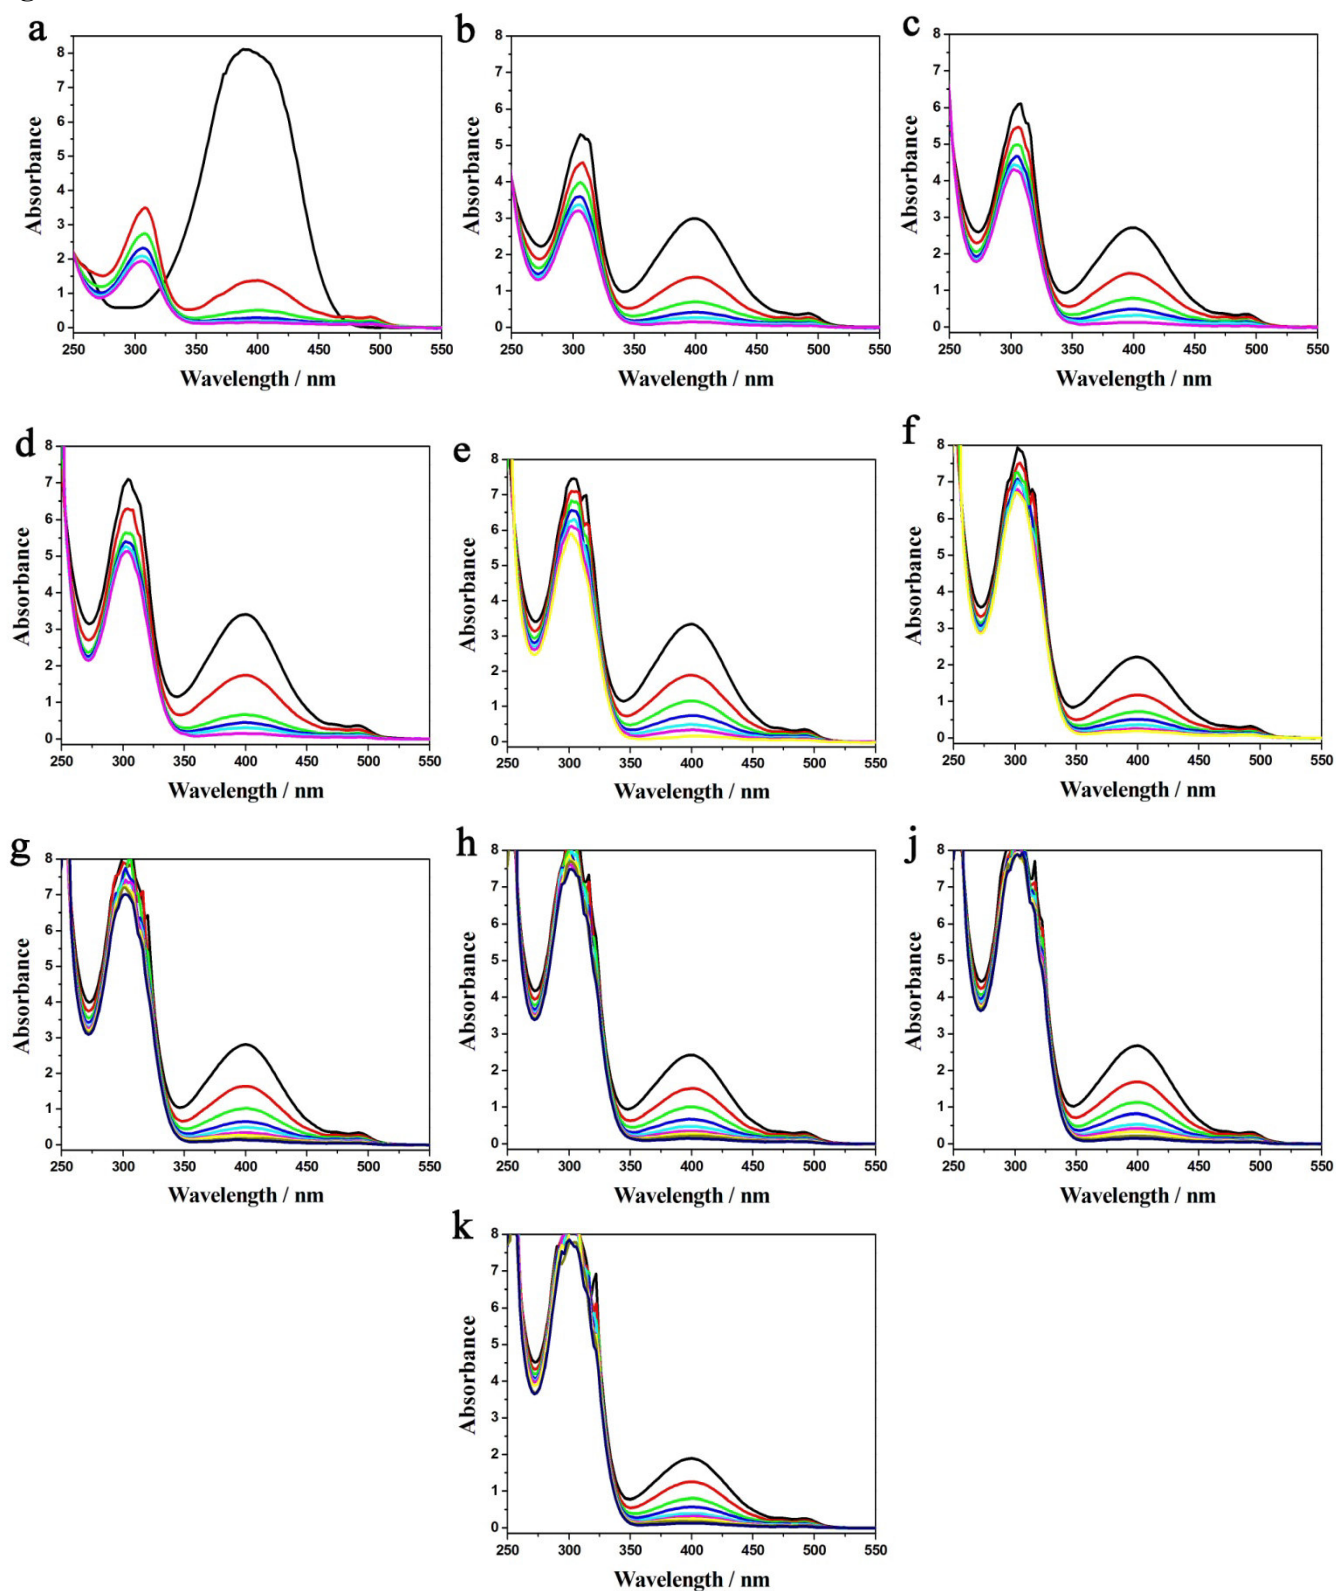

Figure S5. Time-dependent UV-vis spectral changes in ten successive cycles 4-nitrophenol (4-NP) catalyzed reduction reaction with 0.05 mg Co@Pt/Pd@Co(OH)<sub>2</sub> catalysts.

**Figure S6**

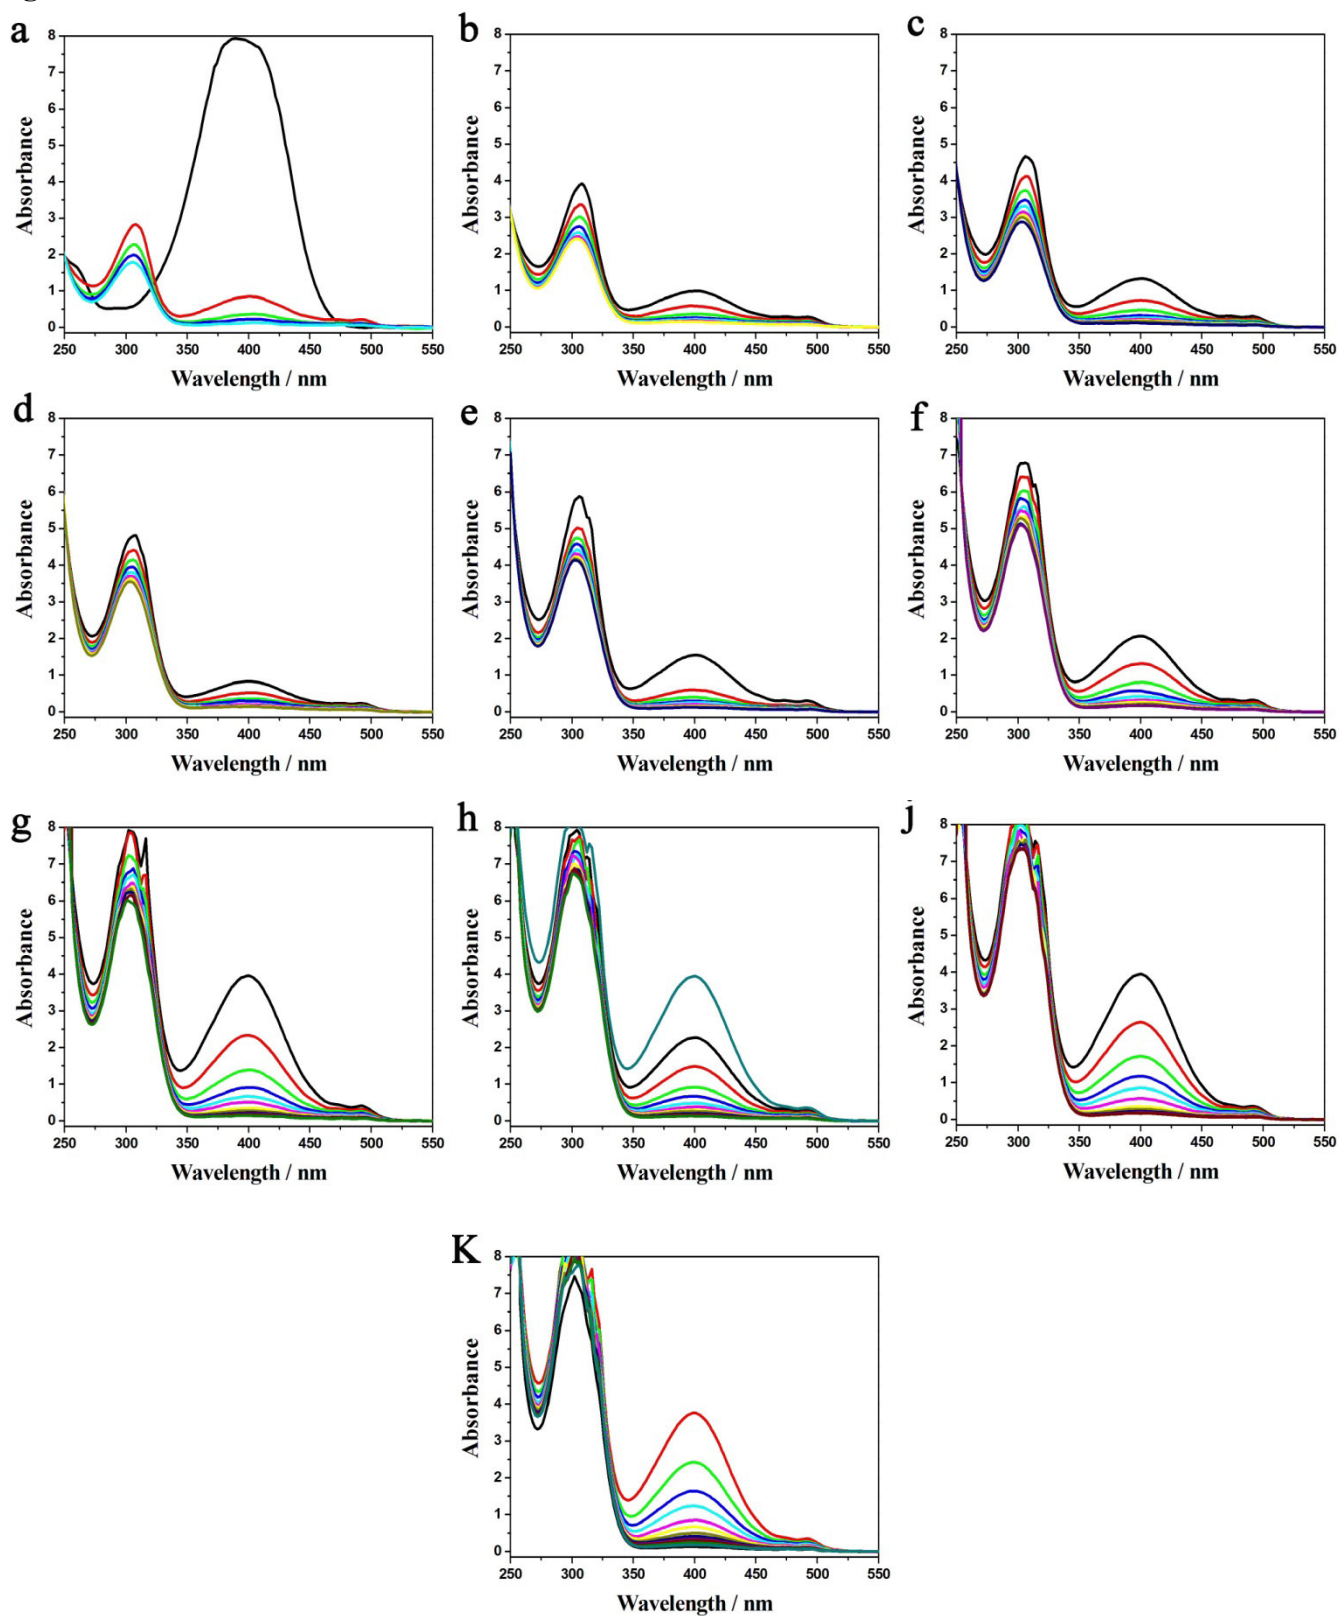

**Figure S6.** Time-dependent UV-vis spectral changes in ten successive cycles 4-nitrophenol (4-NP) catalyzed reduction reaction with 0.05 mg Co@Pt/Pd catalysts.
